# Supplementary material
Source: PubMed Central journal article supplement (PMC7334525)
Supplement: pnas.2000807117.sapp.pdf [file pnas.2000807117.sapp.pdf]

1

## 2 **Supplementary Information for**

### 3 **Supervised learning through physical changes in a mechanical system**

4 **Menachem Stern, Chukwunonso Arinze, Leron Perez, Stephanie Palmer, Arvind Murugan**

5 **Arvind Murugan.**

6 **E-mail: [amurugan@uchicago.edu](mailto:amurugan@uchicago.edu)**

#### 7 **This PDF file includes:**

- 8     Supplementary text
- 9     Figs. S1 to S4
- 10    Legends for Dataset S1 to S4
- 11    SI References

#### 12 **Other supplementary materials for this manuscript include the following:**

- 13     Datasets S1 to S4

## 14 Supporting Information Text

### 15 Supplementary Appendix 1 - Folding origami sheets

16 **Energy of folded structures.** The origami sheets used in this work are based on a self-folding origami energy model developed  
 17 and validated in previous studies (1–3). The effects of stiff creases are modeled by using torsional spring elements on each  
 18 crease (4, 5). Here we discuss in detail how the energy of a folded structure is computed.

19 For thin origami sheets with free-folding creases, the primary contribution to the energy of a folded structure is due to  
 20 bending of the sheet faces. Instead of modelling the faces directly, we look at the mechanical constraints inherent to the  
 21 geometry of the vertices. An origami vertex is known to apply 3 constraints on the dihedral folding angles of the creases  
 22 connected to it (due to embedding of the sheet in 3D-space). The constraints can be derived by noting that the vertex must  
 23 not tear open when folded. Thus, starting from any crease, alternating rotations about the dihedral and sector angles around  
 24 the vertex have to result in an identity operation (2, 4, 5).

25 Suppose there are  $N$  creases denoted by an index  $i$ , each folded to an angle  $\rho_i$ , and  $N$  sectors with angles  $\theta_i$  around the  
 26 vertex. Rotations about one dihedral angle and one sector would combine to form a rotation matrix

$$27 \quad R_i = \begin{pmatrix} 1 & 0 & 0 \\ 0 & \cos \rho_i & -\sin \rho_i \\ 0 & \sin \rho_i & \cos \rho_i \end{pmatrix} \begin{pmatrix} \cos \theta_i & -\sin \theta_i & 0 \\ \sin \theta_i & \cos \theta_i & 0 \\ 0 & 0 & 1 \end{pmatrix}. \quad [1]$$

28 For the vertex to be closed (i.e. not torn open) in a folded structure, the combination of rotation about all crease dihedral  
 29 angles and sector angles must be the identity:

$$30 \quad A \equiv \prod_{i=1}^N R_i = I. \quad [2]$$

31 A folded structure with values  $\rho_i$  that do not satisfy Eq. 2 must cause the sheet faces to bend. Mathematically, this effect  
 32 will manifest in finite off-diagonal values in the matrix  $A \equiv \prod_{i=1}^N R_i$ . As there are 3 independent non-diagonal elements, we  
 33 say that the vertex imparts 3 mechanical constraints on the dihedral angles  $\rho_i$  around it.

34 At the flat state all  $\rho_i = 0$ , so that all constraints are trivially satisfied. We can write down an expansion for the 3  
 35 off-diagonal terms of  $A$  ( $T_1 \equiv A_{12}, T_2 \equiv A_{13}, T_3 \equiv A_{23}$ ) in powers of the folding angles:

$$36 \quad T_a(\rho_i) = C_a^i \rho_i + D_a^{ij} \rho_i \rho_j + \dots \quad [3]$$

37 Then, the energy of breaking these constraints is taken as the sum of squares of the residues  $T_a$  of the constraint equations  
 38  $E_{\text{Vertex}} \sim \sum_a T_a(\rho_i)^2$ . Summing this vertex energy over all the vertices of the sheet gives rise to the total face bending energy.  
 39 The energy due to folding of a stiff crease (modeled as a torsional spring with modulus  $\kappa_i$ ) is quadratic in the folding angle  
 40  $E_{\text{Crease},i} = \frac{1}{2} k_i \rho_i^2$ . The total energy of a folded sheet with stiff creases is thus computed as

$$41 \quad E_{\text{sheet}}(\boldsymbol{\rho}) \equiv E_{\text{Face}} + E_{\text{Crease}} = \kappa \sum_{v \in \text{vertices}} \sum_{a=1}^3 T_{va}(\boldsymbol{\rho}_v)^2 + \frac{1}{2} \sum_{i \in \text{creases}} k_i \rho_i^2, \quad [4]$$

42 With  $\kappa$  the face bending stiffness scale (chosen as  $\kappa = 1$  in this work), and  $k_i$  the creases stiffness values. The scale of  
 43 creases stiffness is denoted by  $\bar{k}$ . The choice of stiffness energy scale plays an important role in our learning protocol. We have  
 44 previously shown how the face bending energy scales like  $\rho^4$  (5), while the crease stiffness energy scales like  $\bar{k} \rho^2$ . In turn, this  
 45 gives rise to a transition folding angle scale in our model  $\rho_c = \sqrt{\bar{k}}$ . For large folding angles  $\rho \gg \rho_c$ , sheet bending energy  
 46 dominates, and the folding landscape is controlled solely by the sheet geometry. At small folding angles  $\rho \ll \rho_c$  (close to the  
 47 flat state), crease stiffness dominates, and it is possible to reshape the force-folding map. The goal of training is to reshape this  
 48 map close to the flat state, such that the applied forces fold the sheet into desired folded states. Throughout this work, we  
 49 choose an initial uniform crease stiffness  $k_i = 0.02$ . We find that trained sheets, though having heterogeneous stiffness profiles,  
 50 still maintain a dominant stiffness scale at  $\bar{k} \sim 0.02$ . In our sheets the transition scale is thus given by  $\rho_c \sim \sqrt{0.02} \sim 0.14 \text{rad}$ , a  
 51 reasonable angle scale close to the flat state. To make learning in sheets feasible, we conclude that a stiffness scale  $\bar{k} \sim 10^{-2}$   
 52 should be chosen.

53 The idea that heterogeneous stiffness at creases modifies the folding response of sheets is at the heart of our learning model.  
 54 This approach was experimentally studied in lattice metamaterials, where stiffness heterogeneities in the form of negative  
 55 stiffness cells are used to tune the material elastic properties (6, 7). More recently, experimental studies have shown that  
 56 heterogeneous stiffness can be used to avoid erroneous actuation pathways in metamaterials. Coulais et. al. have shown  
 57 that a homogeneous stiffness hierarchical structure usually responds to actuation forces in disordered, undesired ways (8).  
 58 However, when the hierarchical metamaterial is designed rationally such that mechanical elements have different bending  
 59 stiffness (different thickness), the structure is compactified in steps to obtain the desired final state. It is similarly known that  
 60 self-folding origami with homogeneous crease stiffness usually folds incorrectly in response to folding forces (4, 9). Biasing the  
 61 creases to facilitate the correct folding can remove such undesired folding pathways so that the sheet folds correctly. Zhou et.  
 62 al. considered designed heterogeneous thickness (and hence stiffness) of hydrogels via photolithography to control the buckling  
 63 of sheets (10). This method was used to remove unwanted pathways in origami, enabling robust folding of sheets into desired  
 64 states (11).

65 **Folding protocol.** Now that the energy of every folded structure  $\rho_i$  of a specific sheet is defined. We can use this energy  
 66 landscape to simulate the folding of the sheet. Experimentally there are multiple different ways to fold origami sheets (12), and  
 67 we have previously outlined how these methods can be simulated numerically (5).

68 One way that an origami sheet can be folded is by applying torques directly to the different creases. Suppose a crease  $i$  of  
 69 a flat sheet is subjected to an external torque  $F_i^{ext}$ . Such a torque will induce folding in the crease, but the sheet generally  
 70 resists folding due to the extra energy that might be associated with a folded structure. Assuming that the folding process is  
 71 over-damped, we may write a dynamical folding equation

$$72 \tau_{\text{relax}} \frac{d\rho_i}{dt} = - \frac{\partial E_{\text{sheet}}(\rho)}{\partial \rho_i} + F_i^{\text{ext}}, \quad [5]$$

where  $\rho$  is the current folded structure, and  $\tau_{\text{relax}}$  a time scale of the over-damped dynamics. In this work we utilize a  
 specific way of folding the origami sheets. Suppose a set of external torques  $\mathbf{F}^{ext}$  is given (this could be a training or a test  
 example as described in the main text). First, the sheet is folded very fast with a strong external torque  $\mathbf{F}^{ext}$ , until a certain  
 folding magnitude  $\rho \equiv \|\rho\|$  is reached. For fast folding we can initially disregard the sheet energy and thus get to a state

$$\rho_{\text{fast}} = \rho \frac{\mathbf{F}^{ext}}{\|\mathbf{F}^{ext}\|}.$$

73 Then the sheet is relaxed subject to the constraint that the overall folding magnitude is fixed (i.e. finding an energy minimum  
 74 on a hyper-sphere of radius  $\rho$  in  $\rho$ -space):

$$\begin{aligned} & \underset{\rho_i}{\text{minimize}} && E_{\text{sheet}}(\rho) \\ & \text{subject to} && \|\rho\| = \rho. \end{aligned} \quad [6]$$

75 Finding a local minimum on the hyper-sphere guarantees that this folded structure would naturally occur if the sheet is  
 76 folded with appropriate torques, as any neighboring configuration costs more energy, and the local minimum will attract the  
 77 folding process. This algorithm is used to mimic experimental fast folding of origami sheets, followed by clamping of a crease  
 78 at a specific folded dihedral angle. Here we also adjust the clamped angle such that the overall magnitude of folding  $\rho$  remains  
 79 fixed and different (discrete) folded structures may be compared more easily. Such fast folding was tested extensively (5), and  
 80 found to obtain the same results as numerically solving the ODE of Eq. 5.

81 **Origami sheets and applied force patterns.** In this project we use specific self-folding origami sheets. These are triangulated  
 82 thin sheets, chosen to have the property of self-foldability. As discussed above, a single vertex induces 3 mechanical constraints  
 83 on the angles of creases surrounding it. Thus each vertex has to connect at least 4 creases or it would be locally rigid. On top  
 84 of that, for a sheet to self-fold, it needs to have one global degree of freedom, so that the number of creases needs to be one  
 85 more than the number of constraints.

86 A simple way of generating patterns meeting these requirements is shown in Fig. S1. These are 4 specific geometries used  
 87 throughout this work as the sheets to be trained. Note that we label them according to their size, given by the number  
 88 creases in each sheet. The number of creases in these sheets are 13, 19, 28, 49 and the numbers of internal vertices are 4, 6, 9, 16.  
 89 Subtracting 3 times the number of vertices from the number of creases leaves us with one global degree of freedom for each of  
 90 these sheets, as required.

91 The number of supported folded structures for these sheets grows exponentially with the number of internal vertices,  
 92 such that these sheets can fold in approximately  $2^4, 2^6, 2^9, 2^{16}$  distinct ways (4, 9). In fact, any sheet with these topologies  
 93 (yet different geometries) will have a similar number of distinct folded structures. The exact details of the supported folded  
 94 structures is dependent on the specific geometry, but we only require the existence of many distinct folded structures for the  
 95 purpose of training.

96 These specific sheets, used for training classifiers throughout this work, are definitely not special. We attempted training  
 97 classifiers using sheets with different geometries and obtained comparable results. In analogy to learning algorithms, the details  
 98 of the sheet and its supported folded structures correspond to the family of models that the training protocol selects from. For  
 99 origami, we believe the available classification models are given by merger of attractors of folded structures, supported by  
 100 the sheet. Since the number of available models to choose from is exponentially large, we reason that the geometry of the  
 101 sheet should play little role in the success of classification. Therefore, any self-folding origami sheet could be used for training  
 102 classifiers.

103 The choice of force patterns applied to the sheets is constrained by the problem definition as training and tests sets. Still,  
 104 there is usually freedom in how these forces are applied. For example, suppose we wish to train the 13 crease sheet of Fig. S1  
 105 on  $2d$  force distributions, such as the spherical caps shown in Fig. 3 in the main text. The training and test sets could thus be  
 106 supplied as pairs of numbers, together with a label (blue\orange). A simple choice for training on such a data set is to pick two  
 107 creases in the sheet and apply torques directly to these creases, as in Eq. (5). Here we utilize a different approach.

108 For an untrained sheet with homogeneous stiffness, it is known that all folded structures reside in the linear null space of  
 109 the vertex constraint matrix  $C$  at the flat state (4). Thus, forces applied in a direction within this null space are more ‘natural’  
 110 for the sheet, and in general cost much less energy due to face bending. We compute the span of the null space for each one of

111 these sheets, and find that the dimension of the null space is  $d_{NS} = \#\text{creases} - 2\#\text{vertices}$ . Therefore the 13 crease sheet has a  
 112  $5D$  null space, while the 49 crease sheets has  $17D$  null space. Then, the training and test examples are mapped to forces in the  
 113 null space as follows. For a  $n - D$  data set, we choose  $n$  random orthonormal vectors in the null space. Each training\test  
 114 example is mapped to a force pattern by assigning every component to one of the random orthonormal vectors. Now these  
 115 forces can be directly applied to the sheet to facilitate the training protocol.

116 Before training, we choose the stiffness values to be uniform. This choice is deliberate, as it allows the training protocol to  
 117 access the entire set of supported folded structures. We find that initializing the stiffness elements with a substantial poorly  
 118 chosen heterogeneous profile negatively affects learning. This is expected, as poor initialization can completely eliminate good  
 119 folded states which could be useful for classification. The training protocol results in *learned* heterogeneous crease stiffness that  
 120 facilitates the correct classification. We observe that a heterogeneous stiffness changes the geometry of the folded structures, so  
 121 that they do not strictly reside in the null space of the untrained sheet. Still, for the moderate heterogeneity developed during  
 122 training, the folded structures are very close to the null space, such that the described mapping is still useful and practical.

## 123 Supplementary Appendix 2 - Training origami sheets

124 **Learning rule.** As discussed in the main text, self-folding origami sheets naturally give rise to complex mapping of force patterns  
 125 to folded structures, with exponentially many structures supported by the sheet. The learning rule developed in this work is  
 126 meant to modify that map by changing crease stiffness coefficients, such that only a small number of folded structures are  
 127 retained, corresponding to the desired classes. Here we will define precisely how the learning rule is chosen and applied to the  
 128 sheet in order to develop the desired mapping.

129 According to the specification of the classification problem, the trainer has no a-priori knowledge of the true underlying  
 130 force distributions. Instead they are supplied with a list of labeled force patterns ('cats' and 'dogs'). These training examples  
 131 are used to find a reference folded structure in the following way. We fold an untrained sheet with every 'dog' example in the  
 132 training set and record the folding angles of the obtained folded structures. Then, a reference 'dog' structure  $\hat{\rho}_{\text{dog}}$  is defined as  
 133 the average of all of these folded structures (normalized appropriately)

$$\hat{\rho}_{\text{dog}} \equiv \frac{\sum_{\mathbf{F} \in \mathcal{F}^{\text{dog}}} \rho_U(\mathbf{F})}{\|\sum_{\mathbf{F} \in \mathcal{F}^{\text{dog}}} \rho_U(\mathbf{F})\|}, \quad [7]$$

134 with  $\mathcal{F}^{\text{dog}}$  the set of 'dog' training force patterns and  $\rho_U(\mathbf{F})$  the folded response of the untrained sheet to force pattern  $\mathbf{F}$ .  
 135 A similar reference state  $\hat{\rho}_{\text{cat}}$  is obtained for the 'cat' training examples. Crucially, once the reference structures are set for the  
 136 untrained sheet, they are kept fixed throughout the training process. These reference structures are used to define the learning  
 137 rule discussed in the main text. Suppose that during the training protocol, we choose a random 'dog' example  $\mathbf{F}^{\text{dog}}$  and apply  
 138 it to the sheet. The normalized resulting folded structure is written as  $\rho(\mathbf{F}^{\text{dog}})$ . The learning rule then compares this folded  
 139 structure to the reference structures defined above and the stiffness coefficients are modified as follows:

$$\begin{aligned} \text{if } \rho(\mathbf{F}^{\text{dog}}) \cdot \hat{\rho}_{\text{dog}} > \rho(\mathbf{F}^{\text{dog}}) \cdot \hat{\rho}_{\text{cat}} : & \quad \frac{dk_i}{dt} = -\alpha \rho_i^r(\mathbf{F}^{\text{dog}}) \\ \text{else :} & \quad \frac{dk_i}{dt} = +\alpha \rho_i^r(\mathbf{F}^{\text{dog}}), \\ k_i \geq 0, i \in \text{creases} & \end{aligned} \quad [8]$$

140 where we choose  $r = 2$ . In essence, the learning rule checks whether the observed folded structure is closer to the 'dog'  
 141 reference than to the 'cat' reference. If it does, the stiffness of creases that fold considerably in that structure is reduced,  
 142 effectively reinforcing this force-fold mapping. An opposite modification occurs if the folded structure is far away from the  
 143 'dog' reference. A similar training rule is used when 'cat' forces patterns are applied, with the understanding that we wish to  
 144 compare the resulting folded structure  $\rho(\mathbf{F}^{\text{cat}})$  to the 'cat' reference  $\hat{\rho}_{\text{cat}}$ . The intuition for this learning rule is that the softer  
 145 a crease is, the more it will tend to fold. Thus if the sheet responds to a force in a desired way, making the creases that fold  
 146 more softer will increase the likelihood that it will continue acting in the right way when subject to that force. Conversely, if  
 147 the sheet does not respond correctly, stiffening reduces the likelihood it will respond incorrectly to that force in the future.  
 148 This intuition sheds light on the question of interpretability in our model, as creases that correlate with certain features in the  
 149 classified data will tend to be softer after training.

150 As discussed in the main text, our learning modifies stiffness according to the strain energy at each crease  $\Delta k \sim \rho^r$ , with  
 151  $r = 2$ . We have considered training sheets with other values of  $r$  in the range 1 – 5, as seen in Figure S2. These trials gave rise  
 152 to qualitatively similar results. We thus elected to use  $r = 2$  for our classification problems.

153 Note that while our learning rule is local in the space of creases, it can still learn non-local correlations in the space of  
 154 input forces. It is believed that biological systems use local learning rule (13), an idea often stated as 'Hebbian learning' (14).  
 155 Though such local learning rules are in principle less powerful than arbitrary non-local rules, they can indeed facilitate learning  
 156 in complex data sets (15, 16).

157 This learning rule can naturally be generalized to more than two classes. If  $c$  classes are to be classified, one could define  
 158  $c$  reference folded states. Then Eq. 8 could be used for learning from given training examples, with a simple modification;  
 159 Crease  $i$  should be softened in proportion to the folding angle  $\rho_i^2$  if the folded state is closest to the appropriate reference state.  
 160 Otherwise, the crease should be stiffened.

161 **Assigning labels to folded structures.** To begin with, we are given labeled force patterns, and an untrained sheet with many  
 162 available folded structures. It is important to note that these folded structures are equivalent and not intrinsically labeled.  
 163 Thus, as part of the learning protocol we must specify how to label these folded structures, and in particular which of them to  
 164 call ‘dog’ and ‘cat’ (or ‘blue’ and ‘orange’). A simple solution would be to choose 2 of the folded structures in advance and  
 165 assign the classification labels to them. Unfortunately, this turns out to be too restrictive for a couple of reasons. First, the  
 166 choice may be far from ideal in the sense that these labeled folded structures are very different than the actual folded response  
 167 of the sheet to the labeled force patterns. Furthermore, as the training process modifies the stiffness of different creases, the  
 168 folded structures supported by the sheet change as well, either by moving around or disappearing altogether in saddle-node  
 169 bifurcations (5). We thus take a different approach to labeling folded structures, as detailed below.

170 Suppose we have trained a sheet for some time, and it now has a particular stiffness profile on its creases  $k_i$ . To find a folded  
 171 structure of this sheet to be labeled ‘dog’, we apply each of the ‘dog’ training examples once, and record the discrete resulting  
 172 folded structures due to all of them  $\{\rho(\mathbf{F} \in \mathcal{F}^{\text{dog}})\}$ . We then count the training force patterns that folded into each one of the  
 173 structures in this set. The folded structure that resulted from the largest number of training force patterns is chosen to be  
 174 labeled as ‘dog’. In case of a tie, e.g. two or more folded structures folding as a result of the same number of force patterns,  
 175 one of these structures is randomly chosen to serve as the label. Thus, the labels for ‘dog’ and ‘cat’ are decided through simple  
 176 plurality rules every time we compute the classification accuracy of the sheet. Note that force patterns may also fold the sheet  
 177 into structures not labeled as either ‘cat’ or ‘dog’, in which case they count as failed classification. If both ‘dog’ and ‘cat’  
 178 labels are chosen to be associated with the same folded structure, a plurality rule between the two classes decides which class  
 179 is labeled with that structure (i.e. whether more ‘cat’ or ‘dog’ force patterns folded into that structure), while the other is  
 180 assigned with the runner up structure of that labels’ plurality vote. Finally, if the sheet is over-trained to the point where  
 181 only one folded structure remains, that structure is labeled as both ‘cat’ and ‘dog’, such that classification fails completely, by  
 182 definition.

183 **Effective cost function.** In this work we have defined our learning rule as a supervised physical process modifying the stiffness  
 184 coefficients of an origami sheet. It is interesting to compare this kind of learning protocol to more established learning algorithms  
 185 originating in computer science and statistics. An important difference is that traditional learning algorithms are usually  
 186 defined as an optimization problem, where the function to be optimized (often called cost or loss function) incorporates the  
 187 training data.

188 A simple example of a learning algorithm is linear regression, where the cost function is usually chosen as a least squares  
 189 form, with differences taken between a linear model  $h(x)$  and the observations  $y$ :

$$\text{Cost} \equiv \sum_{d \in \text{data}} (h(x_d) - y_d)^2 \quad [9]$$

$$h(x) = a_0 + a_1 x$$

The regression (or learning algorithm) then optimizes the cost function with respect to the model parameters  $\mathbf{a} \equiv (a_0, a_1)$   
 minimize  $\text{Cost}(\{x\}, \{y\}; \mathbf{a})$ .

190 This optimization can be performed in any number of ways, but a practically favored method (at least for more advanced  
 191 algorithms like deep learning) is mini-batch stochastic gradient descent (SGD) (17). In an extreme case, when the mini-batches  
 192 are chosen to be of size 1, a single training example  $(x, y)$  is chosen at random in each step, and one computes the gradient  
 193 (with respect to parameters  $\mathbf{a}$ ) of the cost function defined with this example alone  $\mathbf{G} \equiv \nabla_{\mathbf{a}}(h(x) - y)^2$ . Now, training proceeds  
 194 by modifying the parameters in proportion to the the gradient of this single example cost function

$$\mathbf{a} \rightarrow \mathbf{a} - \alpha \mathbf{G}, \quad [10]$$

195 where  $\alpha$  is a scalar known as the learning rate. We may compare this single example SGD with our origami training protocol.  
 196 It is relatively easy to see that our training rule (Eq. 8), once a standard wait time is chosen at the folded state, has the form  
 197 of SGD, making it similar in essence to other learning algorithms. To find out what effective cost function gives rise to the  
 198 origami learning rule, we integrate Eq. 8 with respect to the stiffness coefficients

$$\text{cost}_{\text{map}}(\rho(\mathbf{F}^{\text{dog}})) = f \sum_{i \in \text{creases}} k_i \rho_i^2(\mathbf{F}^{\text{dog}})$$

$$\begin{aligned} \text{if } \rho(\mathbf{F}^{\text{dog}}) \cdot \hat{\rho}_{\text{dog}} > \rho(\mathbf{F}^{\text{dog}}) \cdot \hat{\rho}_{\text{cat}} : & \quad f = +1 \\ \text{else :} & \quad f = -1 \end{aligned} \quad [11]$$

199 Similarly to the linear regression example, our origami training protocol attempts to minimize this derived cost function,  
 200 one training example at a time. Inspecting this function, note that it is very similar to the energy of the torsional springs in  
 201 the folded structure  $E_{\text{Crease}}(\rho) \sim \sum_i k_i \rho_i^2$ . The difference is in the ‘supervising factor’  $f$  that can be  $\pm 1$  whether the folded  
 202 structure is accepted or not. We conclude that our origami training protocol is attempting to minimize the energy of accepted  
 203 folded structures, while maximizing the energy of rejected structures. It is however important to note that the origami model  
 204 does not have a fundamental cost function to optimize, but instead a local learning rule, from which a cost function emerges.

**Complexity of origami classification.** Self folding origami is often associated with difficult (NP-complete) computational problems. The Classic work of Bern and Hayes has shown that determining whether a sheet is rigidly foldable is NP-complete (18). More recently, it was shown that even folding a given sheet to a desired folded state is NP-complete (4). These NP results apply to a sheet with soft creases; consequently there are many ways (e.g., MV assignments) of incorrectly folding the sheet. In fact, the result can be intuitively understood by a mapping from folding origami to a satisfiability (SAT) problem of a set of equations (one for each vertex) with boolean variables representing the M or V state of each crease at that vertex. Such a SAT problem can also be visualized as a spin glass Hamiltonian with many local minima (19).

Thus, we expect that no efficient (polynomial time) algorithm can modify *all* origami sheets in a way that makes them easy to fold. Fortunately, computational complexity is a statement about the most difficult instances of a particular problem. It is certainly possible that an efficient algorithm can fold a *typical* sheet in a desired way. We have previously described such an algorithm (5), based on linear or quadratic programming, that selects the correct crease stiffness on creases to support easy folding of the sheet. It was shown that this algorithm can facilitate easy folding of many sheets, which would otherwise require great care to fold correctly. This idea, that the right crease stiffness heterogeneity can be used to make a typical sheet fold in desired ways, is used as the basis of our learning algorithm presented in this work. When crease stiffnesses are introduced, many or all of these incorrect ways of folding can be made energetically unfavorable. In the SAT or spin glass analogy, stiffnesses can be viewed as fields or biases for the variables that lift many of the minima. Thus, the stiffnesses found by our algorithm modify the relevant SAT problem until it is easily solvable. Finally, we must note that results about NP-hardness are worst case results; i.e., there exists at least one sub-class of problems that are exponential time to solve. The supervised learning framework here works with reasonable consistency but any such statistical approach that typically works cannot contradict any NP-hardness results, since it fails on some problems.

Supervised learning, and supervised classification specifically, are NP-complete problems as well (20). Given a large set of constraints (data points) and a certain family of models, we do not know of an efficient algorithm guaranteeing a set accuracy of classification. In this way, machine learning is similar to problems in physics such as spin glasses (19), and self folding origami. With regards to complexity, the learning protocol suggested in this work is similar to machine learning algorithms. Neither our learning rule nor traditional algorithms guarantee an accurate classification for a specific data set and model (in our case, specific sheet). However, it is known experimentally that an accurate solution to a classification problem can be found by using more expressive models (e.g. a deeper neural network). Similarly, we find that larger sheets with more stiff creases provide better classification results, as shown in the main text.

**Example classification problem.** In this section we provide further detail about the example classification problem discussed at length in the main text, and shown in Figure 3. While it is not a standard benchmark classification problem, we wish to include this extra information here for the sake of future reproduction of these results by other physically motivated learning models. The full data set, including the training forces and the progress of the training protocol, as well as MATLAB codes for training the sheet, are included as supplementary files.

As described in the main text, we use a 13 crease sheet to classify forces drawn from two classes (Figure 3a). The initial sheet has uniform stiffness on all creases ( $k_i = 0.02$ , in the units where bending stiffness is chosen as 1). We consider the  $5d$  null-space of the sheet and classify forces in that space. Force directions  $F_1$  and  $F_2$ , defining the distribution to be classified, are two random orthonormal directions in this null-space. We draw 20 training forces from each class, dog and cat, given according to the distribution  $S^{\text{dog}} = \{\mathbf{F} | \mathbf{F} \cdot \mathbf{F}_{\text{dog}} \geq D, \mathbf{F} \cdot \mathbf{F}_1 > \mathbf{F} \cdot \mathbf{F}_2\}$ , and similarly for  $S^{\text{cat}}$  for a threshold  $D = 0.6$ . The forces we pick are normalized, so that they live on the surface of a  $5d$  sphere, but only 2 of these dimensions are relevant for classification. Therefore, if we sampled forces with small component in the  $F_1 - F_2$  plane, they would be extremely hard to classify. For this reason we choose the cutoff  $D = 0.6$ , ensuring the sampled forces have a significant component in the relevant space.

Once the training forces are picked, we also sample 800 test forces for each class from the same distribution. The training and test forces are randomly ordered. We note that while the order of training examples affects learning, these effects do not change results qualitatively, as long as all training examples are shown. To train the sheet, we go through the training examples, alternating the class at every iteration. We fold the sheet with these training forces and apply the update rule of Eq. 8 given the obtained folded state. We choose the learning rate  $\alpha = 10^{-4}$ . After exhausting all of the training examples, we say the training has advanced by one epoch. Then, we continue training on the same training set for as long as necessary. Data for this simulation, as well as MATLAB codes for training the sheet, are available as supplements.

### Supplementary Appendix 3 - Using origami sheets to define classification problems

The force distributions classified in the main text are relatively simple. Both the spherical cap and the *Iris* data distributions can be well separated by a hyper-plane, a very simple decision boundary. It is interesting to study the type of decision boundaries naturally trainable in origami sheets – and whether they can be used to classify intrinsically high dimensional data.

There are many ways to obtain high dimensional distributions. Here we choose to study distributions derived from the folding maps of origami sheets. Consider a relatively simple sheet with 2 internal vertices (Fig. S3a). It is known that such sheets support 4 discrete folded structures, and that the linearized null space in which they reside is 3-dimensional. Therefore, if we sample random force patterns within this null space, we expect to see the sheet folding into 4 distinct structures (color coded regions in Fig. S3b). The forces  $F_1, F_2, F_3$  are assigned by randomly choosing Euler angles on the 2-sphere, and 3000 data points are sampled on the positive octant. Note that we sample normalized forces on the surface of a 2 – sphere, such that the distribution of force patterns is actually 2-dimensional.

264 Now, suppose we wish to classify forces to 2 classes ('blue'\ 'orange'). A simple way to create 2 neighboring sets of points is  
265 to take the data of Fig. S3b and merge some attractor regions to create larger groups of points. In Fig. S3c, we merge the  
266 'blue', 'yellow', and 'purple' folded structures to create one region we define as 'blue'. This process yields two distributions that  
267 are intrinsically 2-dimensional, and not naturally separable by a hyper-plane. Larger sheets can be similarly used to create  
268 force distributions in higher dimensional space.

269 With this process, we have access to a new variety of 2-way classification problems, on which we can try to train origami  
270 sheets using the training protocol described in the main text. Crucially, the sheet used to classify such distributions is different  
271 than the sheet used to derive the distribution. In other words, we ask if our training protocol can induce an origami sheet to  
272 mimic the force-fold mapping of another sheet.

273 Suppose we want to classify the distribution seen in Fig. S4a, derived from a 2-vertex sheet as described above. We wish to  
274 train a 13 crease sheet to classify this force pattern data. The untrained sheet has  $2^4$  discrete folded structures that do not  
275 align with the target distribution in any representation that we tested (Fig. S4b). The problem of classification here is to train  
276 this sheet to have just 2 folded structures with the right force-fold mapping as in the target distribution.

277 The target distribution is mapped to applied force patterns on the 13 crease sheet by the construction describe in  
278 Supplementary Appendix 1: choosing random orthonormal vectors in the null space of the 13 crease sheet and mapping the  
279 distribution as components of these vectors. We then randomly sample 20 'blue' and 20 'orange' force patterns, marked as  
280 diamonds in Fig. S4, to serve as the training set. As we train the sheet, the classification accuracy improves dramatically and  
281 reaches a maximum of 82% (test accuracy) after 23 epochs (Fig. S4c). To qualify the classification better, we look at the  
282 classification results corresponding to the maximal accuracy at epoch 23 (Fig. S4d). We observe that the trained decision  
283 boundary resembles the desired boundary, so that the training protocol indeed produced a reasonable classification.

284 Note a few artifacts that still remain in the trained map: 1) there are 3 folded structures left, rather than 2 (a small third  
285 color coded region exists, labeled yellow), 2) a second orange region appeared inside the bulk blue region, emphasizing that the  
286 decision boundaries between folded structures in sheets are generally *not* hyper-planes. We conclude that origami sheets can be  
287 trained to classify distributions derived from other sheets, that are intrinsically higher dimensional than the problems discussed  
288 in the main text. Moreover, the decision boundaries are non-linear, so that in principal sheets can classify data that is not  
289 linearly separable. We leave questions of the sheet size and the complexity of decision boundaries to future studies.

## 290 **Supplementary Appendix 4 - Transforming *Iris* data to applied forces on sheets**

291 The *Iris* data set (21) classified in the main text is a classical problem for classification. In this work we are able train an  
292 origami sheet to correctly classify two species of *Iris* (*I. Versicolor*, *I. Virginica*) at an accuracy of 91%. Here we discuss how  
293 the *Iris* data is used to generate training and test sets of applied force patterns to be used on origami sheets.

294 Each *Iris* example in the data set is given as a vector with 4 features (components): sepal length, sepal width, petal length,  
295 petal width. These length measurements are all given in *cm*. In addition to these measurements, each *Iris* specimen is labeled  
296 as one of the *Iris* species in the study. To generate force pattern sets from this data, we would like the different measurements  
297 for each *Iris* specimen to be components of force vectors in the null space of the origami sheet, as described in Supplementary  
298 Appendix 1. However, the raw *Iris* data is not suited for this purpose due to two reasons. The dimensionful measurements of  
299 lengths, if directly translated to forces, would be far too great for our sheets and will cause it to fold too much and cause the  
300 sheet faces to collide. More crucially, sepal and petal lengths tend to be considerably larger than their widths, and the same  
301 goes for the variance of these variables. This will causes the width variables to be perceived as less important in the training  
302 protocol, and have a negative effect on the classification results.

303 Fortunately, diverse data like this is an issue regularly faced by learning algorithms, and it is generically solved by applying  
304 an invertible transformation to the data. The transformed data is then better suited for the learning algorithm in use. A typical  
305 example of such a transformation in data sets is to normalize each feature (divide by the mean of that feature) and translate  
306 it such that the mean of the transformed data is 0. This transformation is especially useful for classification algorithms like  
307 logistic regression, where the different features have different dimensional units.

308 In our case however, the standard transformation above is not useful, due to a particular property of origami sheets, namely  
309 their  $Z_2$  symmetry. If forces  $\mathbf{F}$  are applied to the sheet and it folds into a state  $\rho$ , then folding the same sheet with forces  $-\mathbf{F}$   
310 will result in a state  $-\rho$ . This is true for any self-folding origami sheet, regardless of the stiffness profile on its creases. This  
311 property cannot be changed by training the sheet. Thus, force patterns of opposite sign and different labels cannot be correctly  
312 classified. A simple way to avoid this issue is to limit the force patterns to reside in a restricted part of force space. We choose  
313 to limit the distributions such that the transformed *Iris* data will all be in the positive 4-hyperoctant.

314 In addition, we want the data to span as much as possible of the positive hyperoctant. This will increase the expressive of  
315 our training protocol, as more discrete folded structures would become available if the applied force patterns are more diverse.  
316 We thus need to transform the *Iris* data to be all positive, and stretch it such that all features have similar variance.

317 To achieve these goals we apply the following linear (invertible) transformation to the *Iris* data of the *Versicolor* and  
318 *Virginica* species. Suppose an *Iris* specimen is given as a vector  $\mathbf{x}$  (where the components are sepal length, sepal width, petal  
319 length, petal width in this order). The vector is transformed by

$$\mathbf{x}^* = A\mathbf{x} + b$$

$$A = \begin{pmatrix} 0.264 & 0 & 0 & 0 \\ 0 & 0.580 & 0 & 0 \\ 0 & 0 & 0.303 & 0 \\ 0 & 0 & 0 & 0.836 \end{pmatrix}, \quad b = -0.880. \quad [12]$$

320 The transformed vector is used to define the force patterns applied to the origami sheet, as described in Supplementary  
 321 Appendix 1. After training is concluded, the transformation can be inverted to relate the origami classification results with the  
 322 original *Iris* data, as shown in the main text.



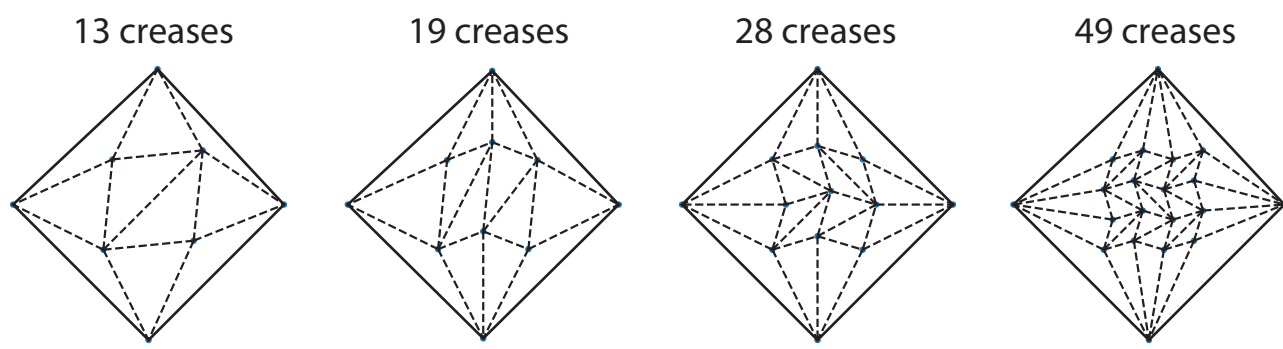

Fig. S1. Origami Sheets used for training. The size of each sheet is determined by the number creases.

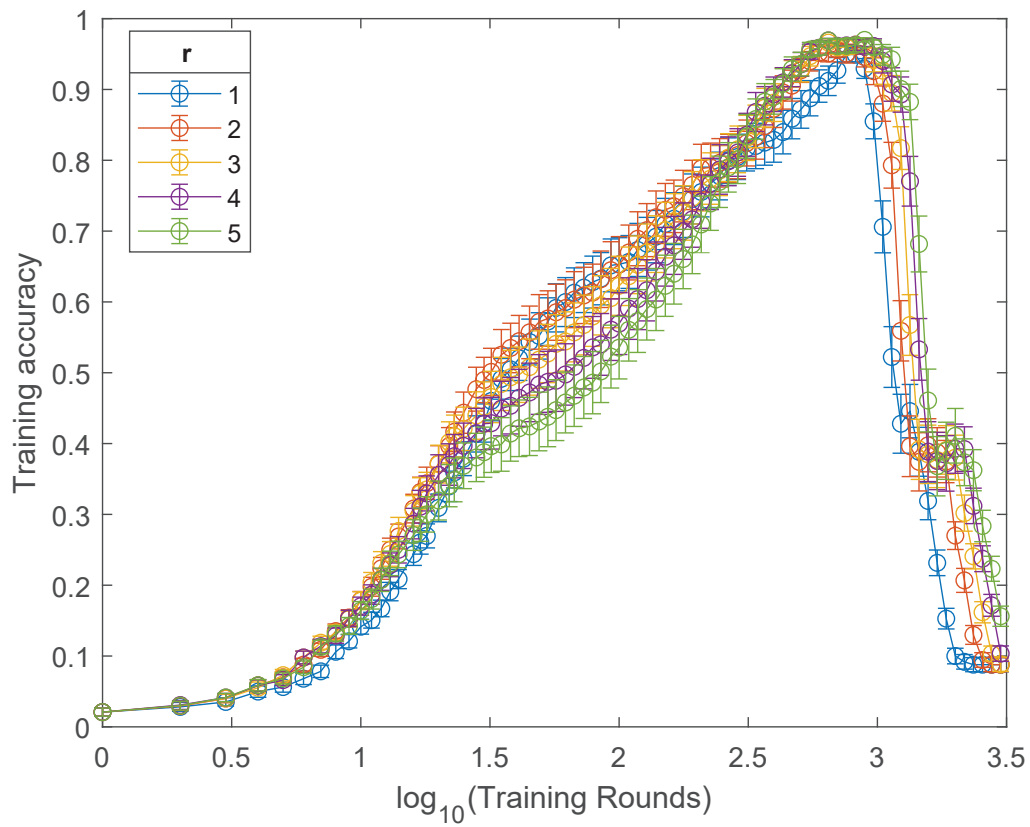

**Fig. S2.** Training sheets to fold as desired with different values of the power parameter  $r$  in Eq. 8. We observe small differences in the accuracy obtained using different values of  $r$ . Throughout this work we use  $r = 2$ , an experimentally viable choice.

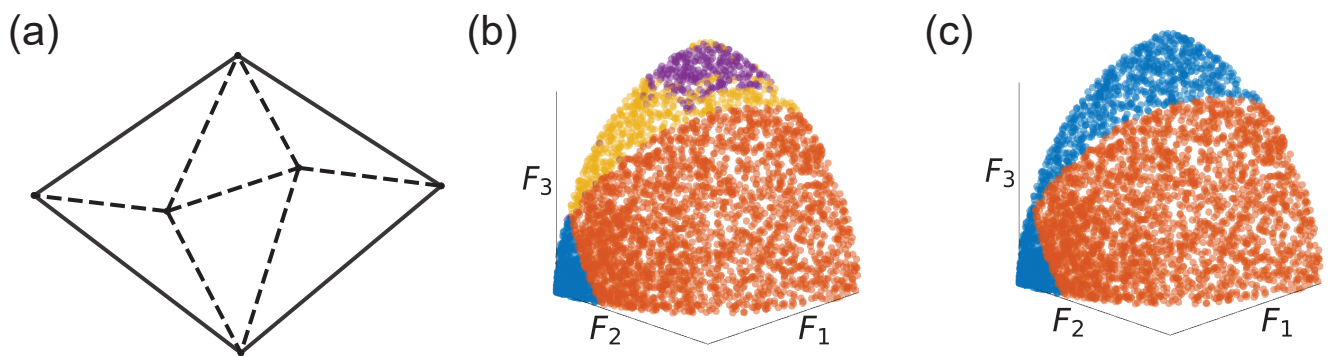

**Fig. S3.** Defining force distributions using the force-fold mapping of an origami sheet. a) Origami sheets with 2 internal vertices support 4 discrete folded structures. b) Sample force patterns on a 2-sphere show the force-fold mapping (4 color coded regions). c) When some attractor regions are merged (here, blue, yellow and purple are merged), we obtain an intrinsically 2-dimensional separator surface between two classes of force patterns.

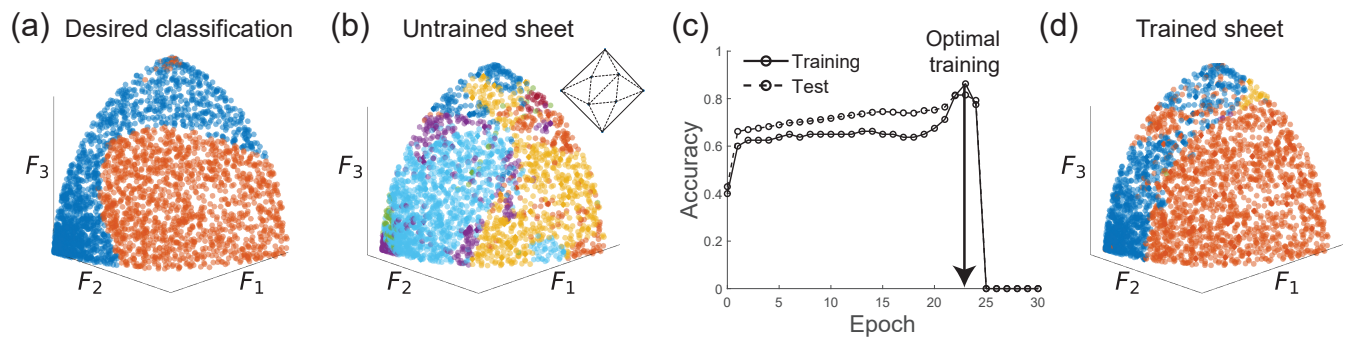

**Fig. S4.** Training a sheet on a force distribution derived from a different sheet. a) Target classification, a sample distribution derived from a small, 2-vertex origami sheet. b) The force-fold map of an untrained 13 crease sheet is very different from the desired mapping. c) With training, the accuracy of classification improves and peaks at 82%. d) The optimally trained sheet has a complex decision boundary that resembles (but different than) the desired boundary.

323 **SI Dataset S1 (BlueFS.txt)**  
324 Training and test forces for the blue class (in the sheet full folding space).

325 **SI Dataset S2 (BlueNS.txt)**  
326 Training and test forces for the blue class (in the sheet null space).

327 **SI Dataset S3 (RedFS.txt)**  
328 Training and test forces for the Red class (in the sheet full folding space).

329 **SI Dataset S4 (RedNS.txt)**  
330 Training and test forces for the Red class (in the sheet null space).

## 331 References

- 332 1. SM Belcastro, TC Hull, Modelling the folding of paper into three dimensions using affine transformations. *Linear Algebr.*  
333 *its applications* **348**, 273–282 (2002).
- 334 2. T Tachi, Geometric considerations for the design of rigid origami structures in *Proceedings of the International Association*  
335 *for Shell and Spatial Structures (IASS) Symposium*. Vol. 12, pp. 458–460 (2010).
- 336 3. MB Pinson, et al., Self-folding origami at any energy scale. *Nat. Commun.* **8**, 15477 (2017).
- 337 4. M Stern, MB Pinson, A Murugan, The complexity of folding self-folding origami. *Phys. Rev. X* **7**, 041070 (2017).
- 338 5. M Stern, V Jayaram, A Murugan, Shaping the topology of folding pathways in mechanical systems. *Nat. Commun.* **9**,  
339 4303 (2018).
- 340 6. S Konarski, M Hamilton, M Haberman, Elastic nonlinearities and wave distortion in heterogeneous materials containing  
341 constrained negative stiffness inclusions in *2014 8th International Congress on Advanced Electromagnetic Materials in*  
342 *Microwaves and Optics*. (IEEE), pp. 130–132 (2014).
- 343 7. BM Goldsberry, MR Haberman, Negative stiffness honeycombs as tunable elastic metamaterials. *J. Appl. Phys.* **123**,  
344 091711 (2018).
- 345 8. C Coulais, A Sabbadini, F Vink, M van Hecke, Multi-step self-guided pathways for shape-changing metamaterials. *Nature*  
346 **561**, 512–515 (2018).
- 347 9. BGg Chen, CD Santangelo, Branches of triangulated origami near the unfolded state. *Phys. Rev. X* **8**, 011034 (2018).
- 348 10. Y Zhou, CM Duque, CD Santangelo, RC Hayward, Biasing buckling direction in shape-programmable hydrogel sheets  
349 with through-thickness gradients. *Adv. Funct. Mater.* **29**, 1905273 (2019).
- 350 11. JH Kang, H Kim, CD Santangelo, RC Hayward, Enabling robust self-folding origami by pre-biasing vertex buckling  
351 direction. *Adv. Mater.* **31**, 0193006 (2019).
- 352 12. EA Peraza-Hernandez, DJ Hartl, RJ Malak Jr, DC Lagoudas, Origami-inspired active structures: a synthesis and review.  
353 *Smart Mater. Struct.* **23**, 094001 (2014).
- 354 13. BA Richards, et al., A deep learning framework for neuroscience. *Nat. neuroscience* **22**, 1761–1770 (2019).
- 355 14. DO Hebb, *The organization of behavior: A neuropsychological theory*. (Psychology Press), (2005).
- 356 15. JR Movellan, Contrastive hebbian learning in the continuous hopfield model in *Connectionist models*. (Elsevier), pp. 10–17  
357 (1991).
- 358 16. S Bartunov, et al., Assessing the scalability of biologically-motivated deep learning algorithms and architectures in  
359 *Advances in Neural Information Processing Systems*. pp. 9368–9378 (2018).
- 360 17. S Ruder, An overview of gradient descent optimization algorithms. *arXiv preprint arXiv:1609.04747* (2016).
- 361 18. M Bern, B Hayes, The complexity of flat origami in *SODA*. (Atlanta, GA), Vol. 96, pp. 175–183 (1996).
- 362 19. M Baity-Jesi, et al., Comparing dynamics: Deep neural networks versus glassy systems. *J. Stat. Mech. Theory Exp.* **2019**,  
363 124013 (2019).
- 364 20. AL Blum, RL Rivest, Training a 3-node neural network is np-complete. *Neural Networks* **5**, 117–127 (1992).
- 365 21. RA Fisher, The use of multiple measurements in taxonomic problems. *Annals eugenics* **7**, 179–188 (1936).
